# Supplementary material for: Todavía 44 millones de analfabetos en Ámerica Latina: Alternativas de alfabetización en América Latina y el Caribe
Source: Royal Society of Chemistry journal article supplement (doi:10.1039/b410763b), 1989-01-01
Supplement: b410763b.pdf [file b410763b.pdf]

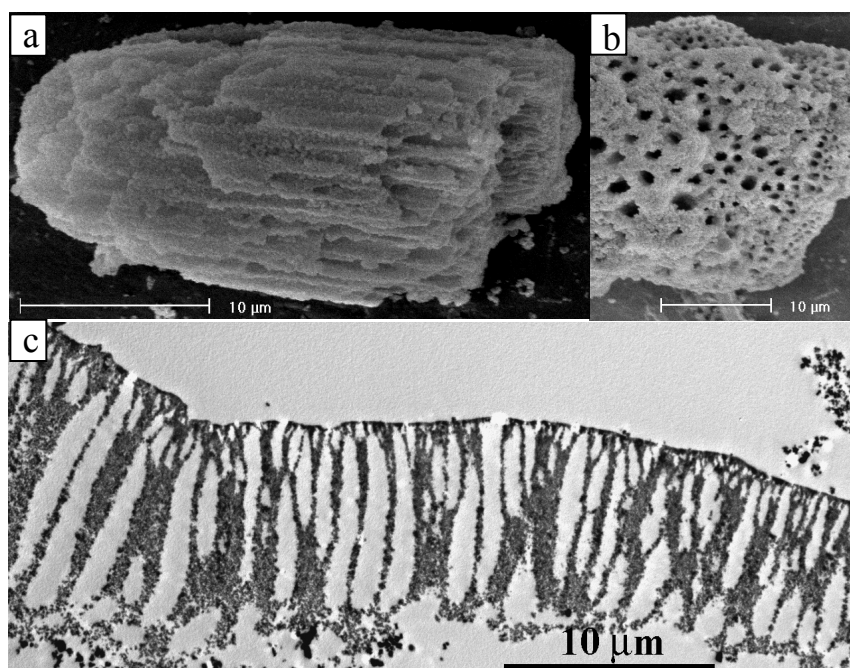

**Fig. 1** (a) SEM image of the as-synthesized ZrP-h sample; (b) SEM image of the calcined ZrP-hc650 sample; (c) cross-sectional TEM image of the ZrP-h sample. The hollow macrochannels are practically parallel to each other, and extend throughout almost the whole particles.

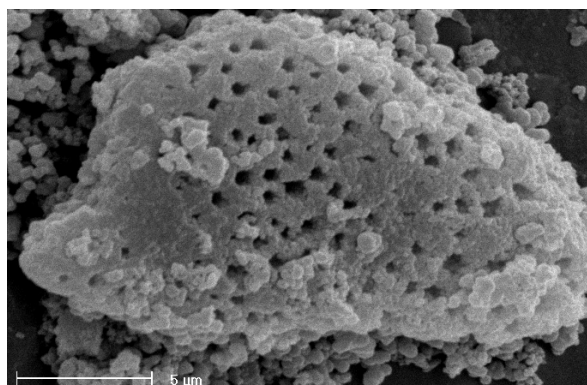

**Fig. 2** SEM image of the ZrPO sample synthesized without autoclaving.

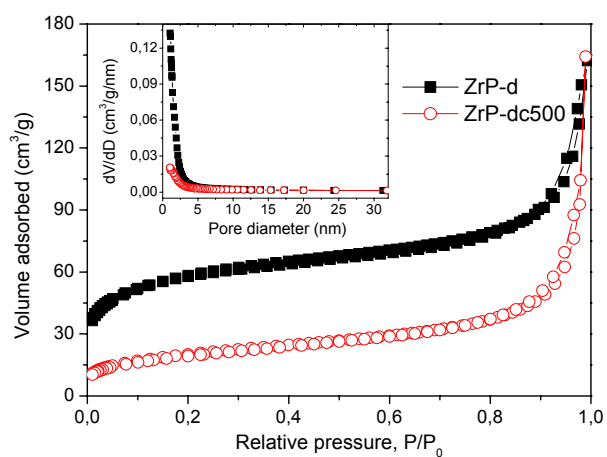

**Fig. 3**  $N_2$  adsorption-desorption isotherms and the corresponding BJH pore size distribution curves (*Inset*) of the ZrPO samples synthesized without autoclaving.
